# Supplementary material for: Size-dependent cytotoxicity of silver nanoparticles in human lung cells: the role of cellular uptake, agglomeration and Ag release
Source: PubMed Central journal article supplement (PMC3933429; doi:10.1186/1743-8977-11-11), 2014-02-17
Supplement: 1743-8977-11-11-S1.pdf [file 1743-8977-11-11-S1.pdf]

**Additional file 1. AgNPs size distribution in cell medium by PCCS**

**Table S1:** The particle size distribution in cell medium (BEGM) by volume and the scattered light intensity determined by PCCS. The particle size distribution by volume corresponds to 10% ( $d_{0.1}$ ), 50% ( $d_{0.5}$ ) and 90% ( $d_{0.9}$ ) and the scattered light intensity of the measurement depends on the size and concentration of the particles in solution.

| Sample               | Time point (h) | $d_{0.1}$ [nm] (volume) | $d_{0.5}$ [nm] (volume) | $d_{0.9}$ [nm] (volume) | Scattered light intensity [kcps] |
|----------------------|----------------|-------------------------|-------------------------|-------------------------|----------------------------------|
| BEGM (blank)         | -              | 1                       | 2                       | 2                       | 3                                |
| 10 nm citrate coated | 0              | 2                       | 7                       | 20                      | 730                              |
|                      | 4              | 2                       | 7                       | 3430                    | 410                              |
|                      | 24             | 2                       | 11                      | 840                     | 63                               |
| 10 nm PVP coated     | 0              | 1                       | 2                       | 3                       | 970                              |
|                      | 4              | 1                       | 3                       | 5                       | 1000                             |
|                      | 24             | 2                       | 6                       | 23                      | 709                              |
| 40 nm citrate coated | 0              | 7                       | 17                      | 350                     | 3200                             |
|                      | 4              | 3                       | 24                      | 3900                    | 1400                             |
|                      | 24             | 19                      | 34                      | 300                     | 800                              |
| 75 nm citrate coated | 0              | 2                       | 4                       | 14                      | 2790                             |
|                      | 4              | 2                       | 74                      | 380                     | 2700                             |
|                      | 24             | 4                       | 19                      | 380                     | 1100                             |
| 50 nm uncoated       | 0              | 1                       | 3                       | 7                       | 860                              |
|                      | 4              | 2                       | 89                      | 520                     | 500                              |
|                      | 24             | 2                       | 9                       | 660                     | 90                               |
