# Supplementary material for: Size-dependent cytotoxicity of silver nanoparticles in human lung cells: the role of cellular uptake, agglomeration and Ag release
Source: PubMed Central journal article supplement (PMC3933429; doi:10.1186/1743-8977-11-11), 2014-02-17
Supplement: 1743-8977-11-11-S2.pdf [file 1743-8977-11-11-S2.pdf]

Additional file 2. Cell viability of BEAS-2B cells after 4 h exposure to AgNPs

A

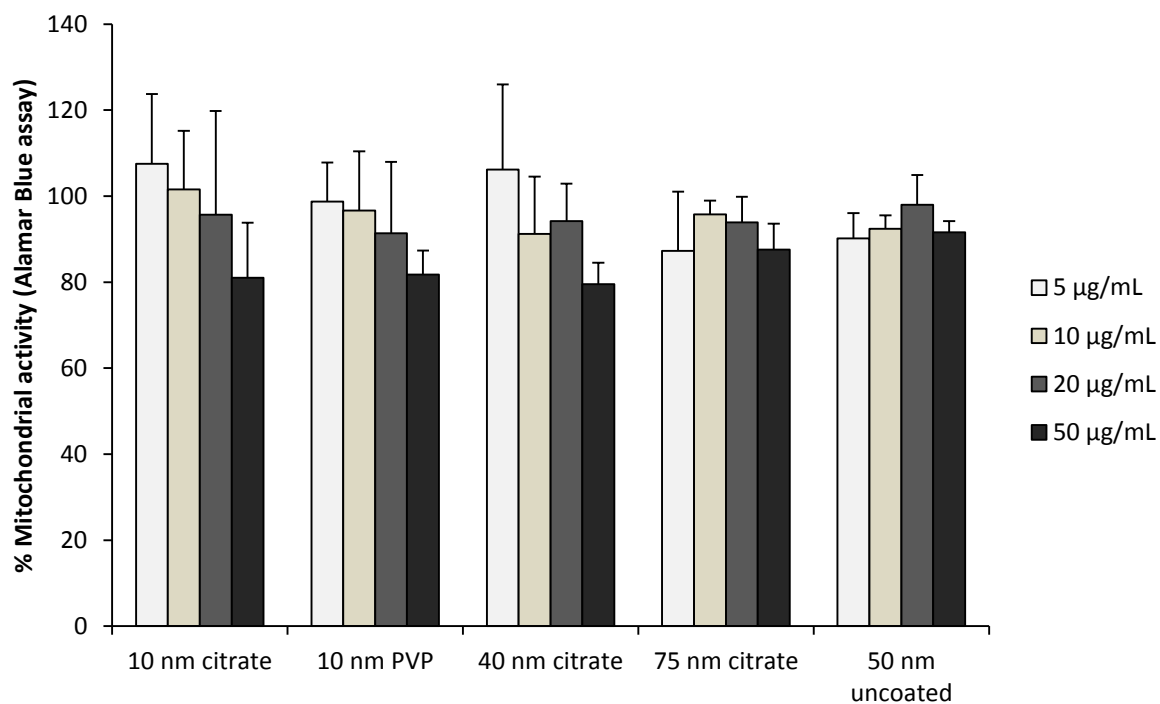

B

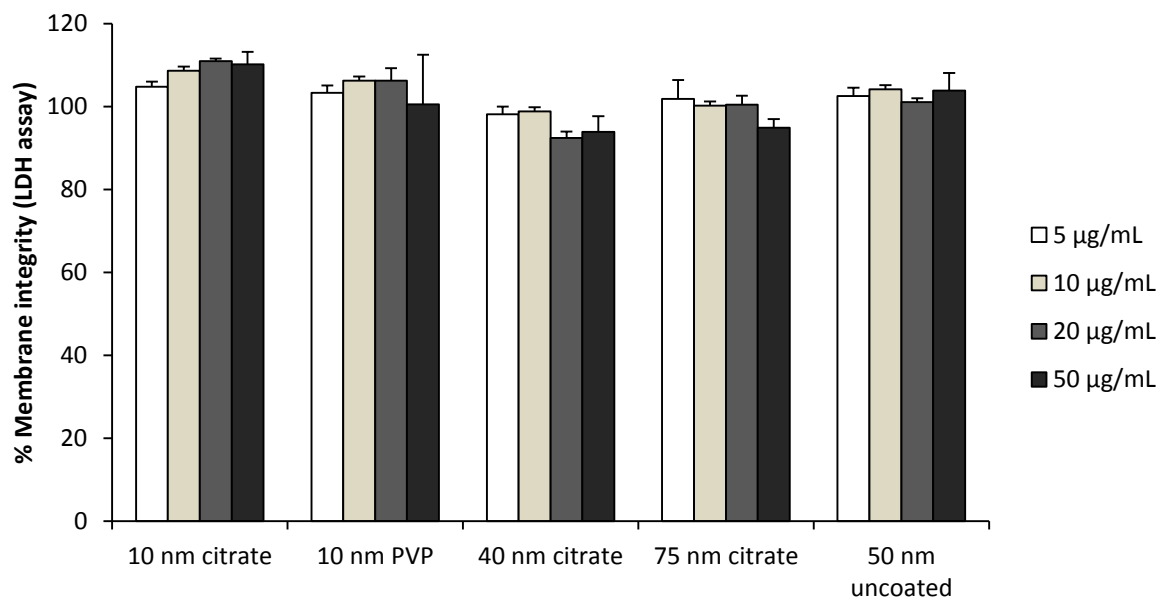

**Figure S1. Cell viability of BEAS-2B cells after 4 h exposure to AgNPs.** Cell viability of BEAS-2B cells after 4 h exposure to AgNPs (5 – 50 µg/mL) was assessed using AB assay (A) and LDH assay (B). Results are presented as mean ± standard deviation of 3 independent experiments.
